# Supplementary figures and images for: Development of an image-based fluorometer with smartphone control for paper analytical devices
Source: Royal Society of Chemistry journal article supplement (doi:10.1039/d3ay01020a), 2023-01-01

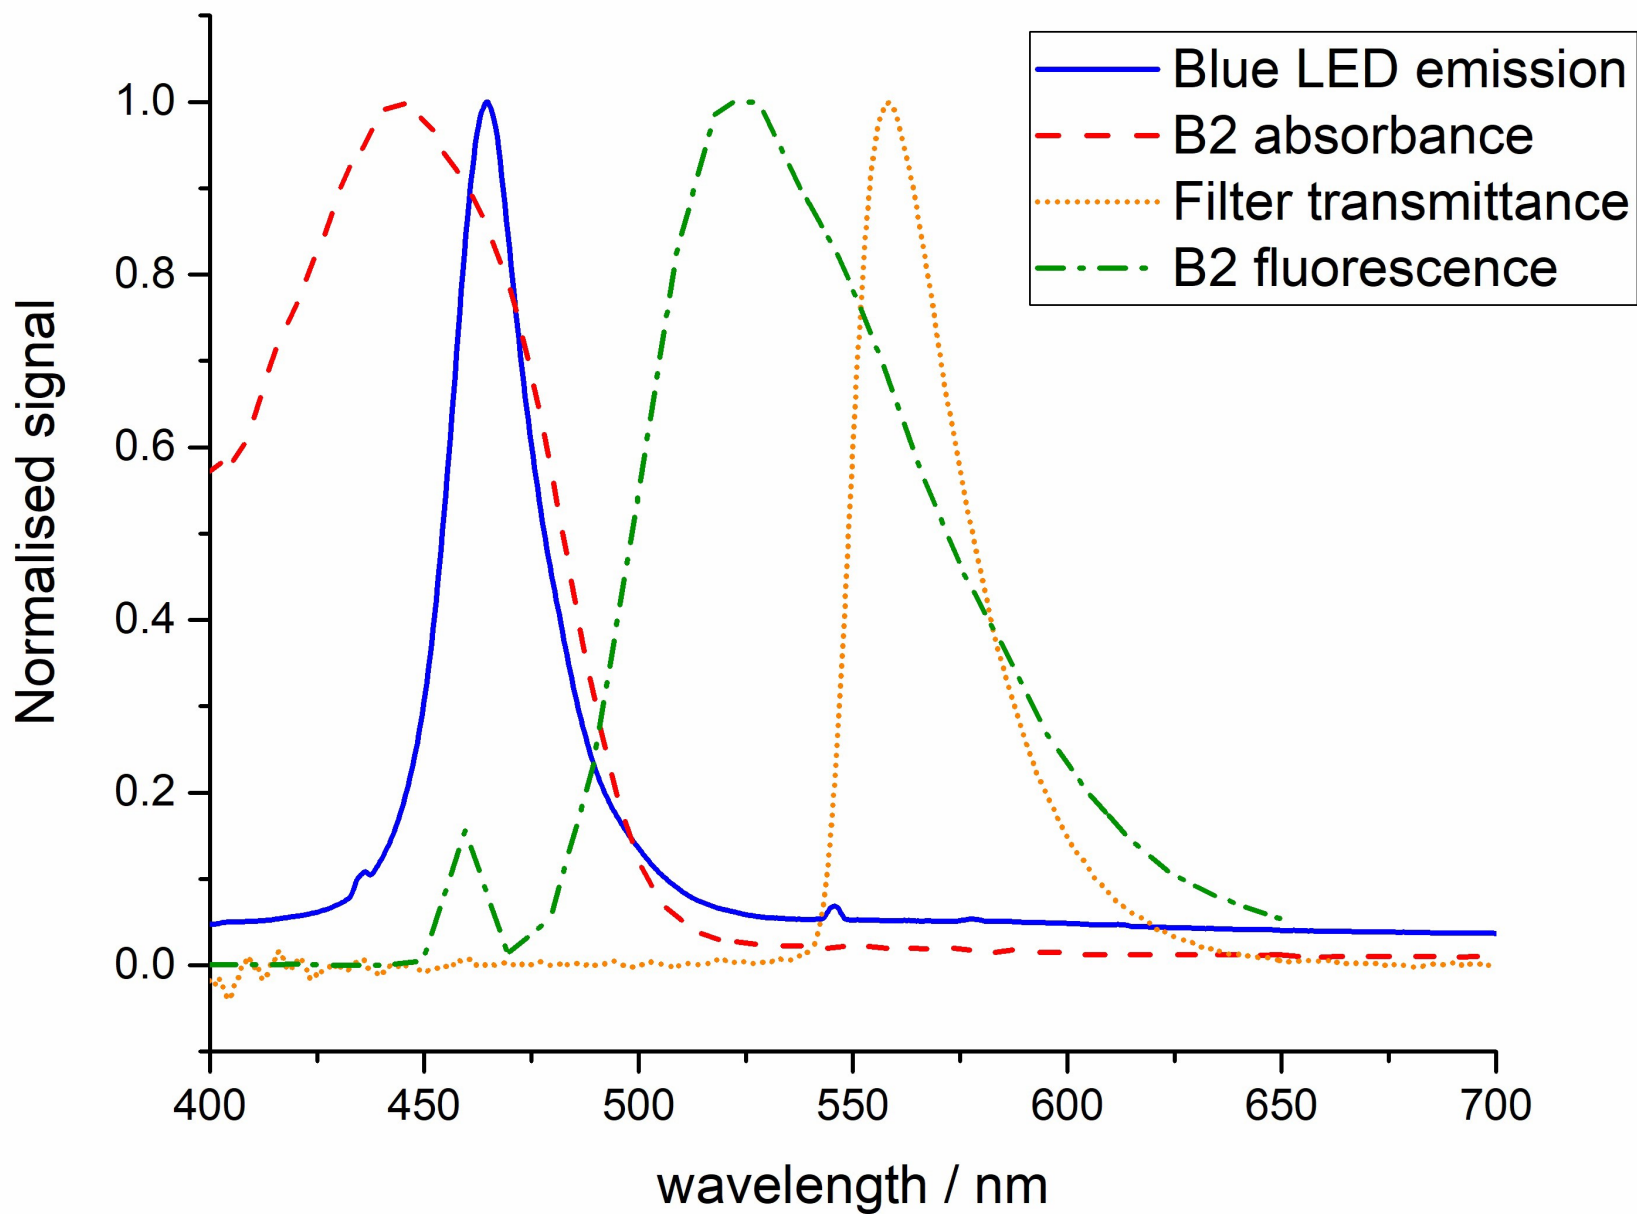

Supplement: d3ay01020a2.pdf [file d3ay01020a2.pdf]
